# Supplementary material for: Synthesized Bis-Triphenyl Phosphonium-Based Nano Vesicles Have Potent and Selective Antibacterial Effects on Several Clinically Relevant Superbugs
Source: Preprints.org preprint supplement (doi:10.20944/preprints202407.0891.v1), 2024-07-11
Supplement: Supplementary file 1 [file supplementary]

# Synthesized *Bis*-Triphenyl Phosphonium-Based Nano Vesicles Have Potent and Selective Antibacterial Effects on Several Clinically Relevant Superbugs

Silvana Alfei <sup>1,\*</sup>, Guendalina Zuccari <sup>1,2,\*</sup>, Francesca Bacchetti <sup>1</sup>, Carola Torazza <sup>1</sup>, Marco Milanese <sup>1,3</sup>, Carlo Siciliano <sup>4</sup>, Constantinos M. Athanassopoulos <sup>5</sup>, Gabriella Piatti <sup>6</sup> and Anna Maria Schito <sup>6</sup>

<sup>1</sup>Department of Pharmacy, University of Genoa, Viale Cembrano, 16148 Genoa, Italy; francesca.bacchetti@edu.unige.it (F.B.); carola.torazza@unige.it (C.T.); [marco.milanese@unige.it](mailto:marco.milanese@unige.it) (M.M.)

<sup>2</sup> Laboratory of Experimental Therapies in Oncology, IRCCS Istituto Giannina Gaslini, Via G. Gaslini 5, 16147, Genoa, Italy

<sup>3</sup> IRCCS Ospedale Policlinico San Martino, Genova, Italia

<sup>4</sup> Department of Pharmacy, Health and Nutritional Sciences, University of Calabria, 87036, Arcavacata of Rende, Italy; [carlo.siciliano@unical.it](mailto:carlo.siciliano@unical.it)

<sup>5</sup> Department of Chemistry, University of Patras, University Campus Rio Achaia, 26504 Greece; [kath@chemistry.upatras.gr](mailto:kath@chemistry.upatras.gr) (C.M.A.)

<sup>6</sup> Department of Surgical Sciences and Integrated Diagnostics (DISC), University of Genoa, Viale Benedetto XV, 6, I-16132 Genova, Italy; [amschito@unige.it](mailto:amschito@unige.it) (A.M.S.); [gabriella.piatti@unige.it](mailto:gabriella.piatti@unige.it) (G.P.)

\*Correspondence: [alfei@difar.unige.it](mailto:alfei@difar.unige.it); Tel.: +39 010 355 2296 (S.A.); [guendalina.zuccari@unige.it](mailto:guendalina.zuccari@unige.it) (G.Z.)

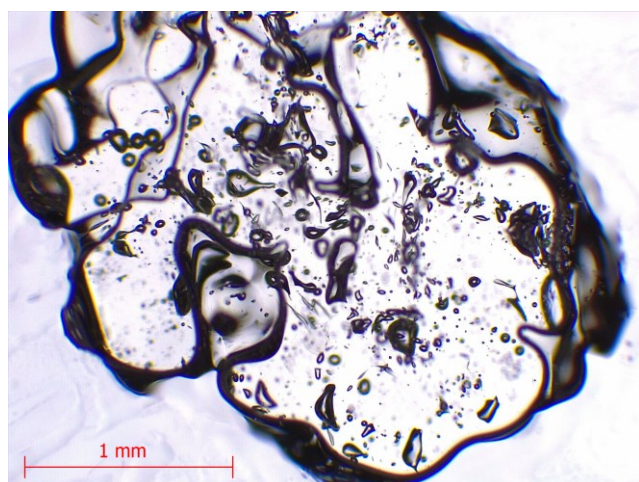

**Figure S1.** Optical micrograph of solid BPPB obtained using a 4 × objective.

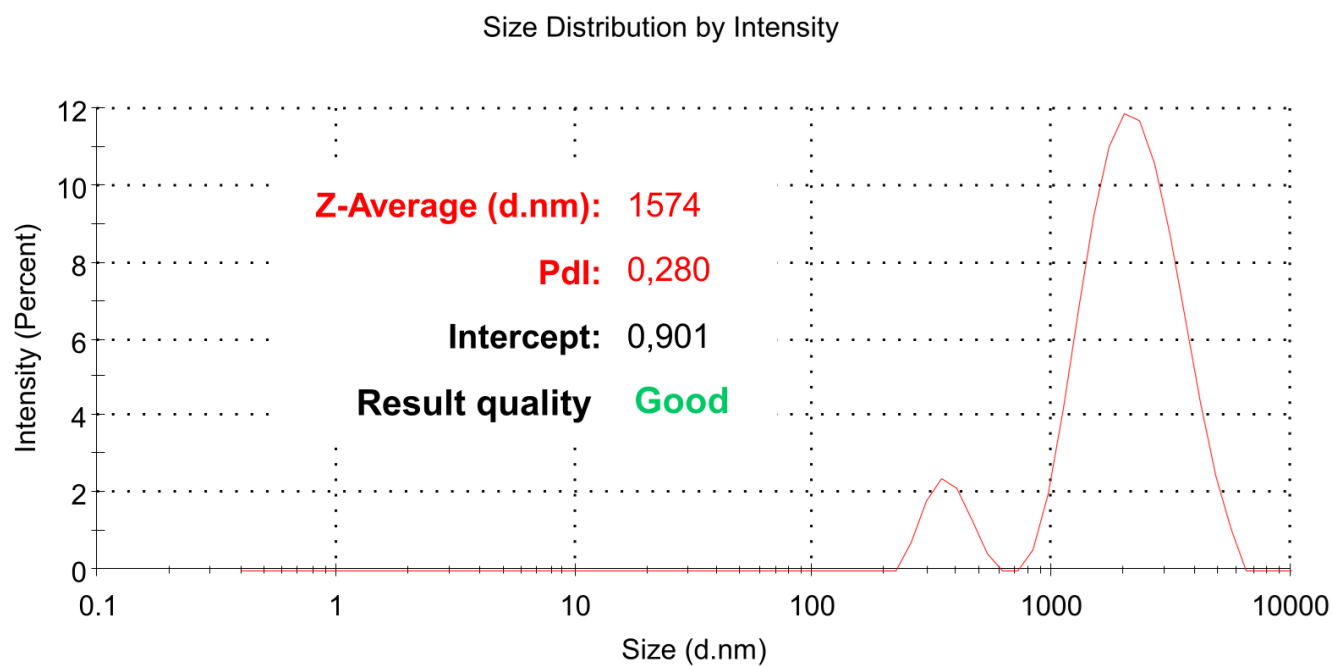

Figure S2. Size distribution of BPPB vesicles and large aggregates self-formed in a 10 mM solution.

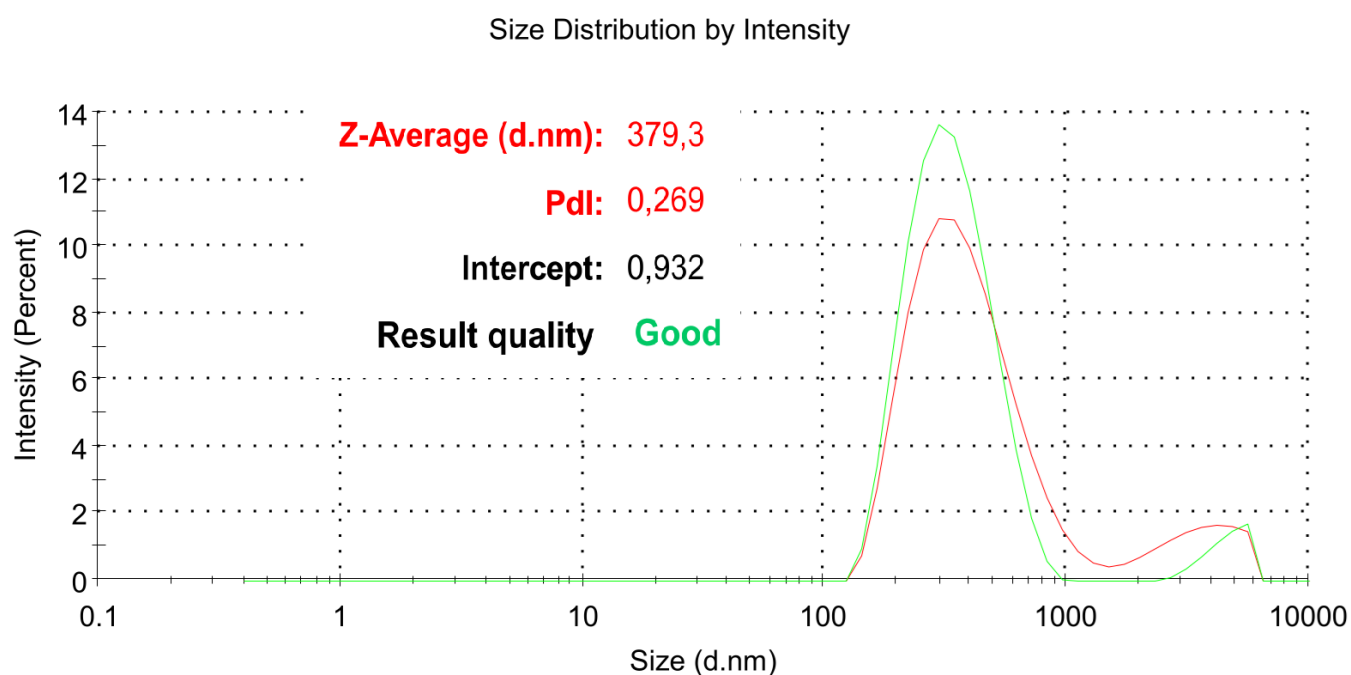

Figure S3. Size distribution of BPPB vesicles and aggregates self-formed in a 5 mM solution.

Results

|                         | Size (d.nm...           | % Intensity: | St Dev (d.n... |
|-------------------------|-------------------------|--------------|----------------|
| Z-Average (d.nm): 41,29 | Peak 1: 77,92           | 77,9         | 32,86          |
| Pdl: 0,584              | Peak 2: 1,605           | 11,3         | 0,1868         |
| Intercept: 0,795        | Peak 3: 12,86           | 5,8          | 2,470          |
| Result quality          | Refer to quality report |              |                |

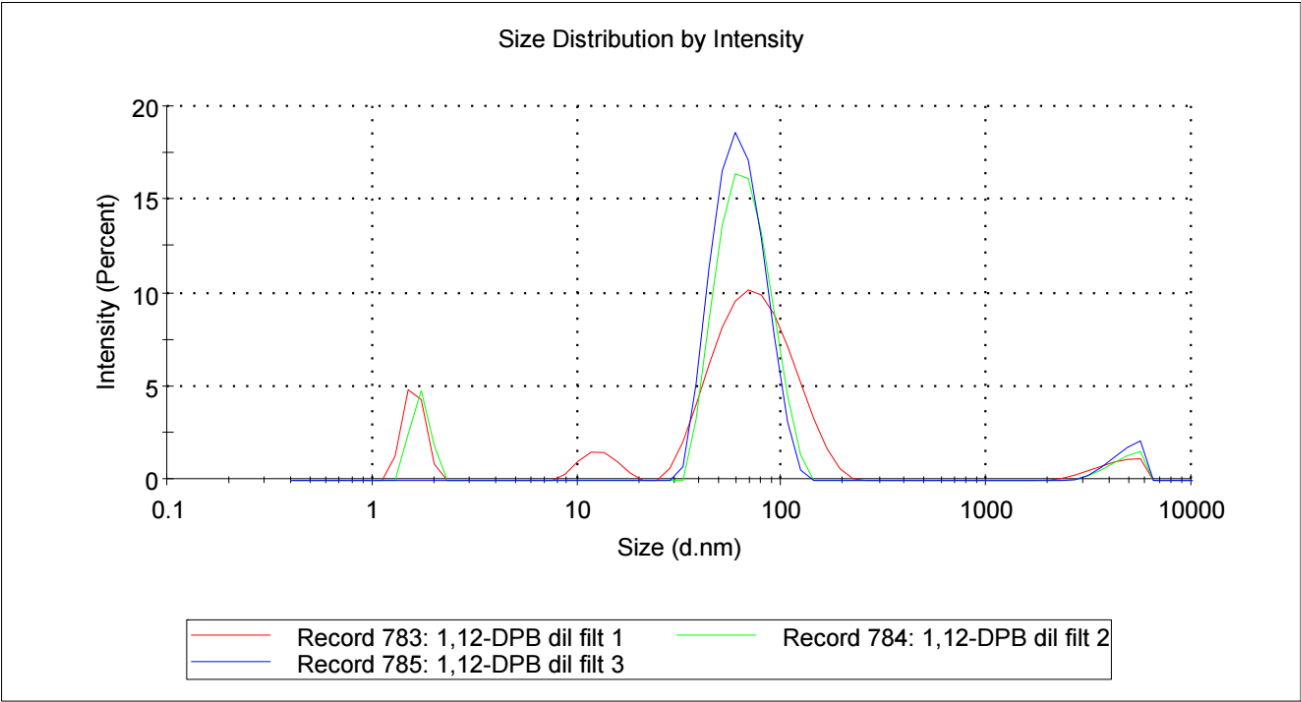

Figure S4. Size distributions of BPPB vesicles and aggregates self-formed in a 5 mM solution.

31  
32

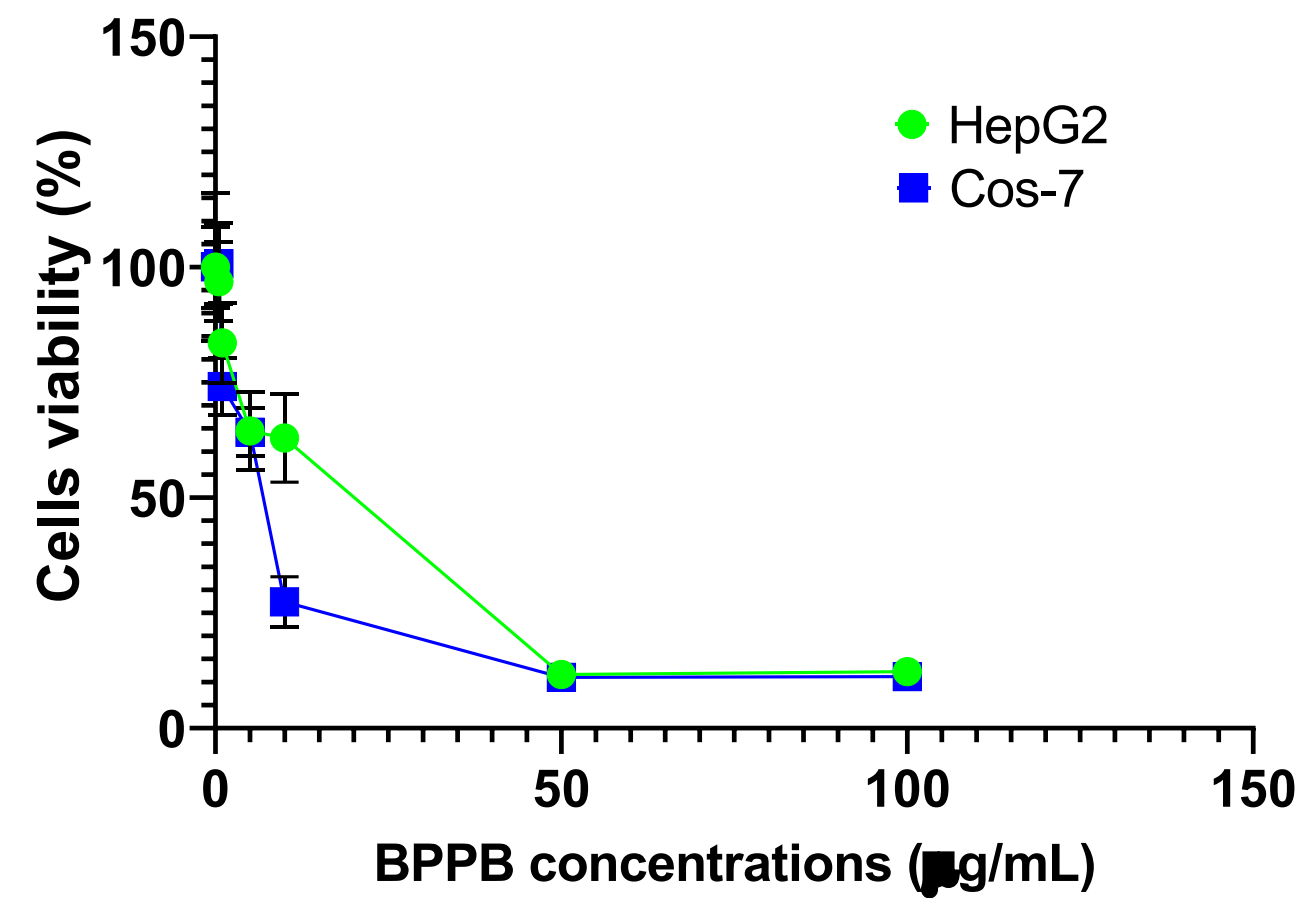

**Figure S5.** Cell viability (%) of Cos-7 (blue trace) and HepG2 (green trace) cells vs increasing BPPB concentrations (0.5-100 µg/mL) after 24 hours of exposure. Concentration = 0.0 µg/mL corresponded to the control.

33  
34  
35

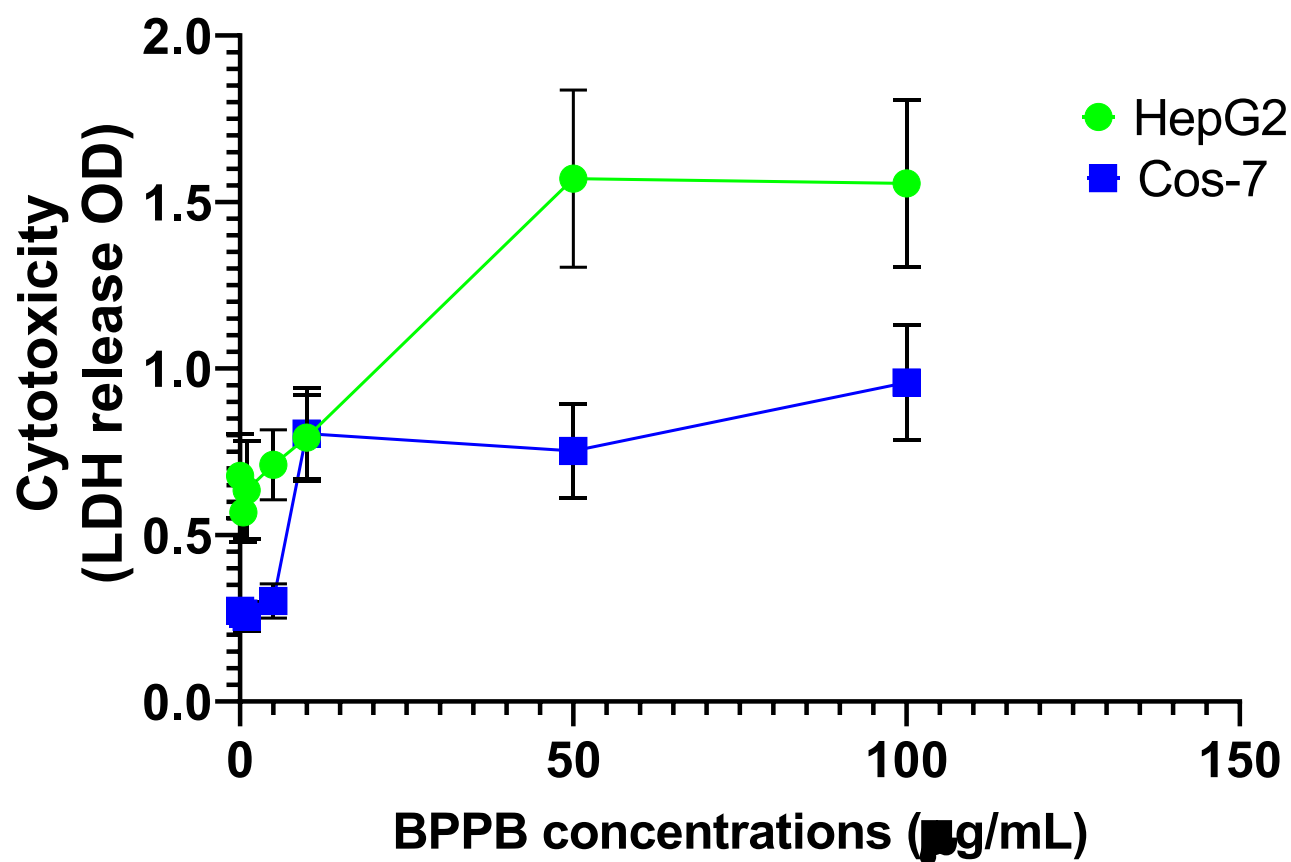

**Figure S6.** Cytotoxicity (LDH release OD) on Cos-7 (blue trace) and HepG2 (green trace) cells vs increasing BPPB concentrations (0.5-100 µg/mL) after 24 hours of exposure. Concentration = 0.0 µg/mL corresponded to the control.

36

37

38

39

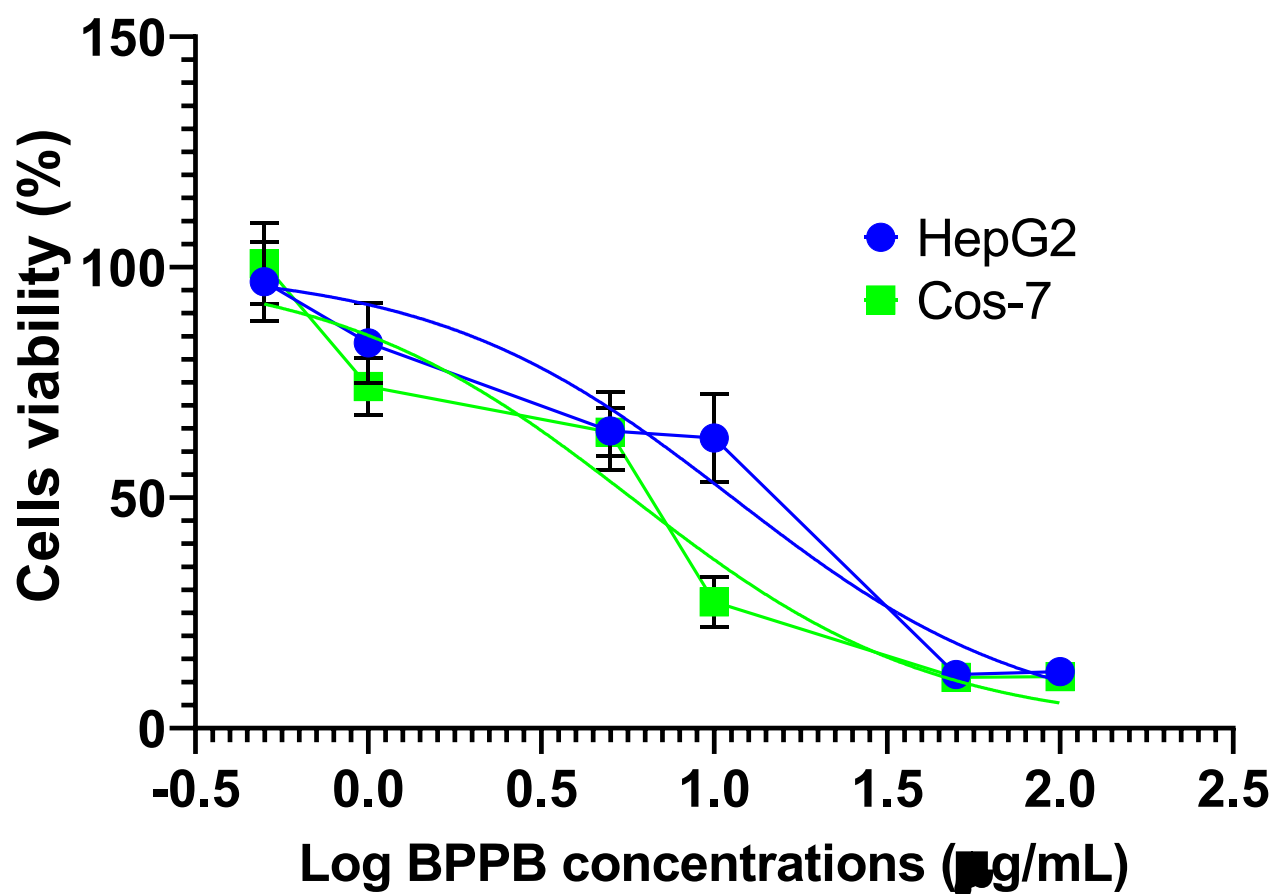

**Figure S7.** Plot of Log concentration of PBBP vs. cell viability (%) (blue and green traces with indicators and error bars) and plot of nonlinear fit of Log concentrations of PBBP vs. cell viability (%) (blue and green traces without indicators).

**Disclaimer/Publisher's Note:** The statements, opinions and data contained in all publications are solely those of the individual author(s) and contributor(s) and not of MDPI and/or the editor(s). MDPI and/or the editor(s) disclaim responsibility for any injury to people or property resulting from any ideas, methods, instructions or products referred to in the content.
